# Supplementary material for: Over-expression of Arabidopsis AtCHR23 chromatin remodeling ATPase results in increased variability of growth and gene expression
Source: PubMed Central journal article supplement (PMC3987066; doi:10.1186/1471-2229-14-76), 2014-03-25
Supplement: 1471-2229-14-76-S1.pdf [file 1471-2229-14-76-S1.pdf]

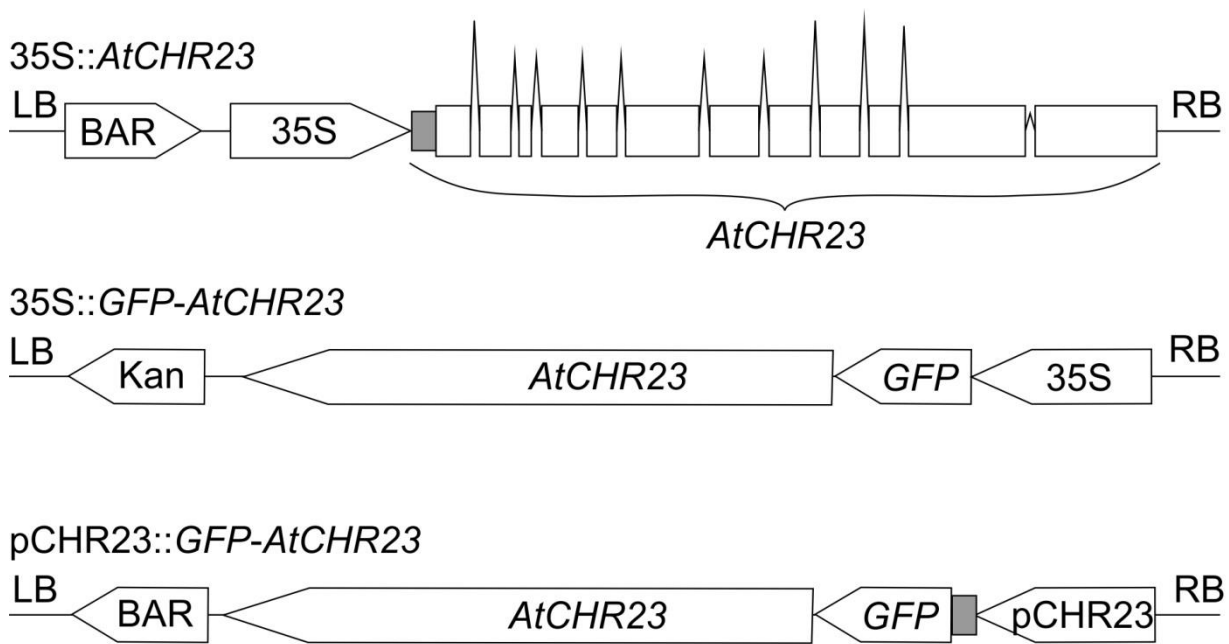

**Figure S1.** Schematic layout of T-DNA regions of plasmids used to generate transgenic Arabidopsis over-expressing *AtCHR23* gene. 35S, CaMV 35S promoter; pCHR23, *AtCHR23* promoter; *GFP*, green fluorescent protein gene; *Kan*, kanamycin resistance gene; *BAR*, barnase herbicide resistance gene; RB, LB, right and left T-DNA borders. Grey shaded box indicate the presence of 5'UTR.

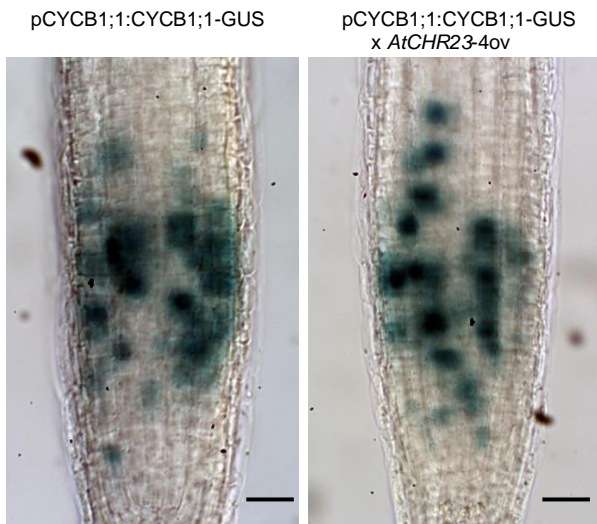

**Figure S2.** Photograph of whole-mount, GUS-stained 4-day-old roots of *CYCB1;1:CYCB1;1-GUS* in wild-type (left) and in *AtCHR23-4ov* homozygous for both transgenes. *AtCHR23-4ov* was crossed with the transgenic line *pCYCB1;1:CYCB1;1-GUS* that contains the *GUS* reporter fused to the mitotic destruction sequence (D-box) and the cyclin *CYCB1;1* promoter. In this reporter line, *GUS* is expressed upon entry into the G2 phase of cell cycle via the *CYCB1;1* promoter and its protein product is degraded upon exit from the metaphase via the D-box. Bars: 20  $\mu$ m.

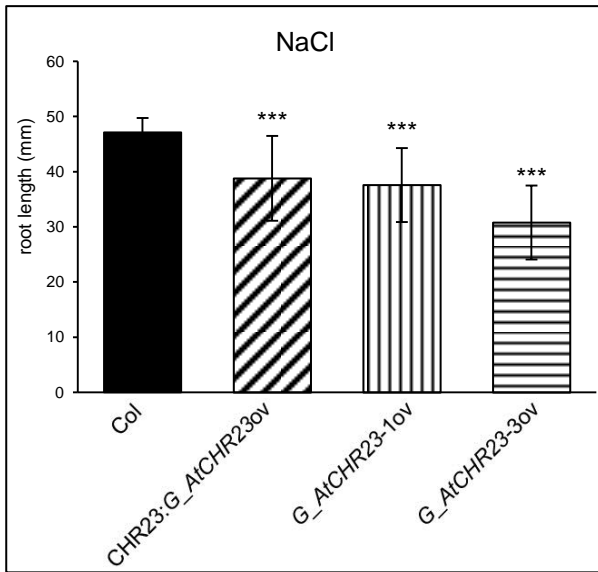

**Figure S3.** The negative impact of *AtCHR23* cDNA over-expression on growth is enhanced by salt stress. Mean ( $\pm$  SD) length of the primary roots of 10-day-old wild-type (Col) and mutant seedlings grown on 75 mM NaCl. For each line 40 seedlings were measured. Asterisks indicate significant differences from the wild type: \*\*\*,  $P < 0.001$ .

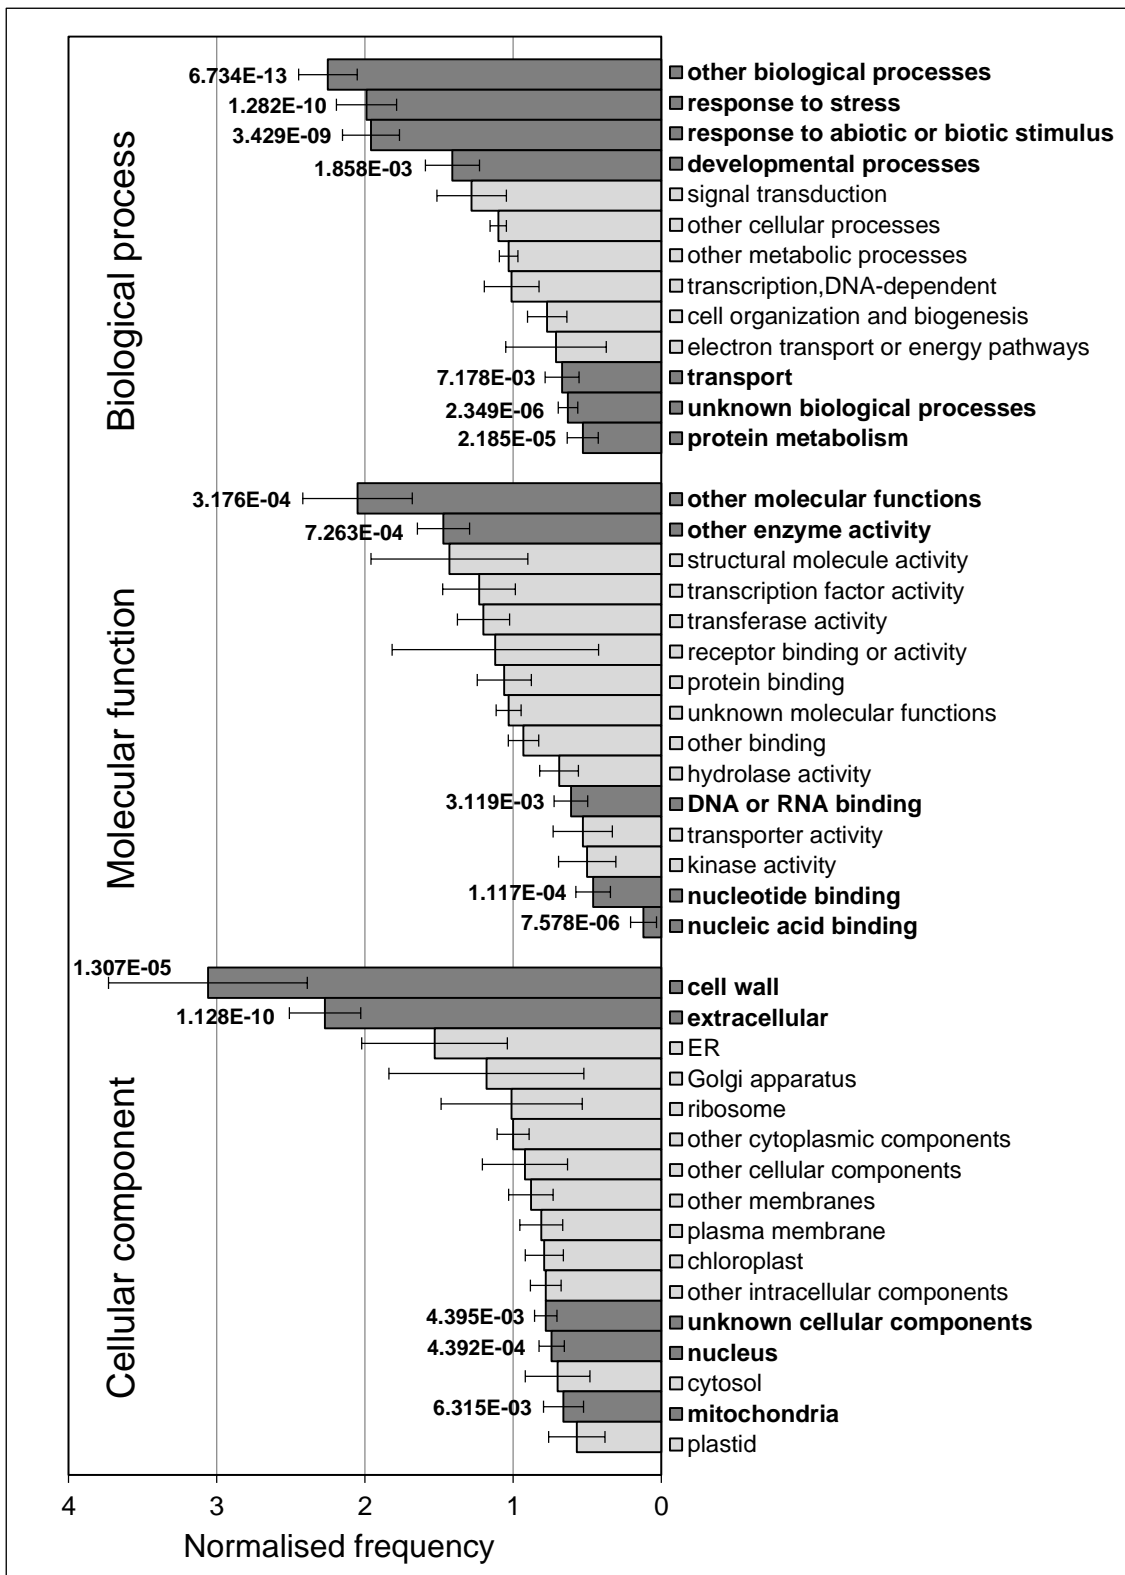

**Figure S4.** Gene ontology (GO) analysis of the genes showing high variability in expression between the two replicates of *AtCHR23* over-expressing mutant grown in long-day conditions. The 298 genes showing at least 3-fold expression difference between the two replicates were classified with Classification SuperViewer. Normalised frequency of GO categories  $\pm$  bootstrap SD is presented. Categories with a normalised frequency greater than 1 are over-represented and lower than 1 are under-represented. The over- or under-representation of categories highlighted in dark grey and bold are statistically significant at  $P < 0.01$ ; the P-value is indicated next to the SD.
